# Supplementary material for: Bacterial synthesis of silicon/silica nanocomposites
Source: Royal Society of Chemistry journal article supplement (doi:10.1039/b719528a), 2008-01-01
Supplement: b719528a.pdf [file b719528a.pdf]

## Electronic Supporting Information (ESI)

### Bacterial Synthesis of Silicon/Silica Nanocomposites

Sanjay Singh, Umananda M. Bhatta, P. V. Satyam, Alok Dhawan, Murali Sastry and B. L. V. Prasad

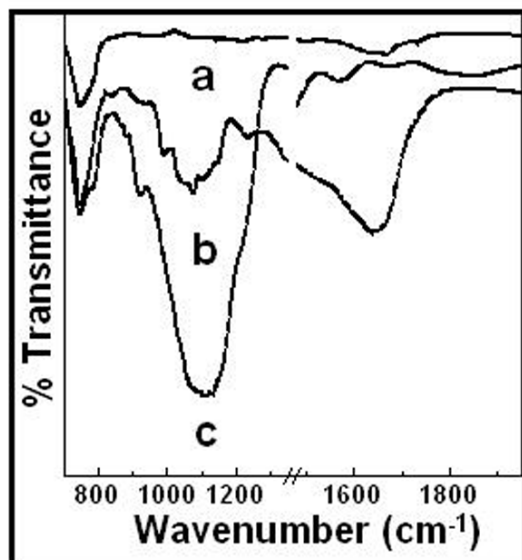

**ESI-Fig. 1** FTIR spectra recorded from Si/SiO<sub>2</sub> nanocomposites synthesized by the exposure of K<sub>2</sub>SiF<sub>6</sub> to *Actinobacter* sp. before (curve-2) and after (curve-3) calcination at 400 °C for 4 h. Curve-1 shows FTIR spectra recorded from salt precursor K<sub>2</sub>SiF<sub>6</sub>.

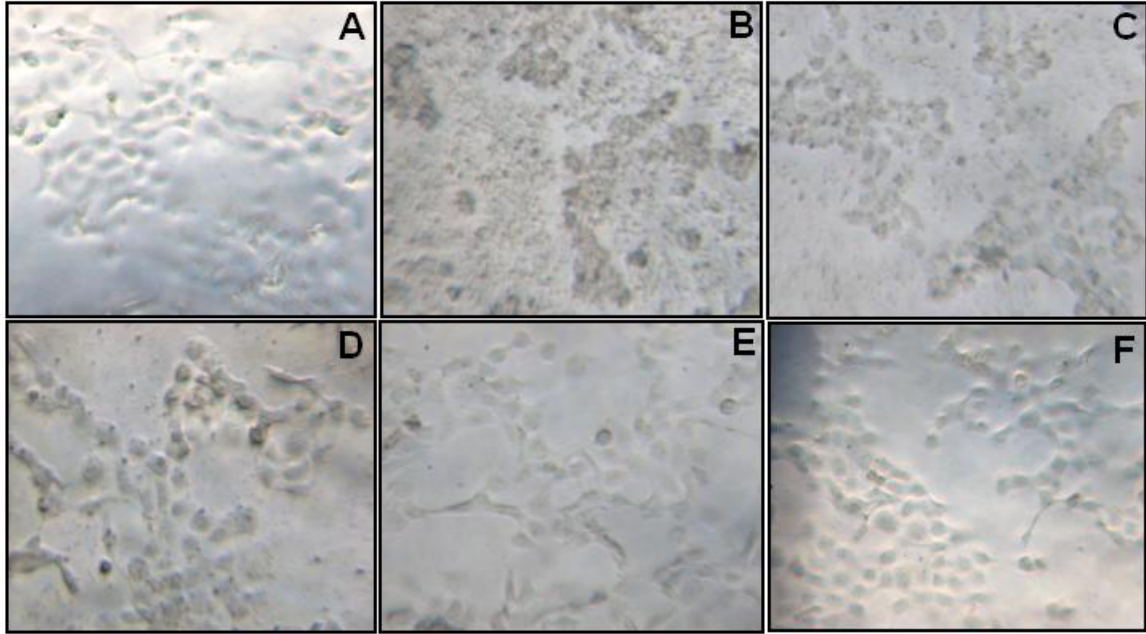

**ESI-Fig. 2** Morphology of Human epithelial (A431) cells after the incubation with Si/SiO<sub>2</sub> nanocomposite for 3h. A-Control, B-10 mM, C-5 mM, D-1 mM, E-500 μM and F-50 μM of Si/SiO<sub>2</sub> nanocomposites.
